# Supplementary material
Source: PubMed Central journal article supplement (PMC4262692)
Supplement: NIHMS635670-supplement-Supp_FigureS1-S5___TableS1.pdf [file NIHMS635670-supplement-Supp_FigureS1-S5___TableS1.pdf]

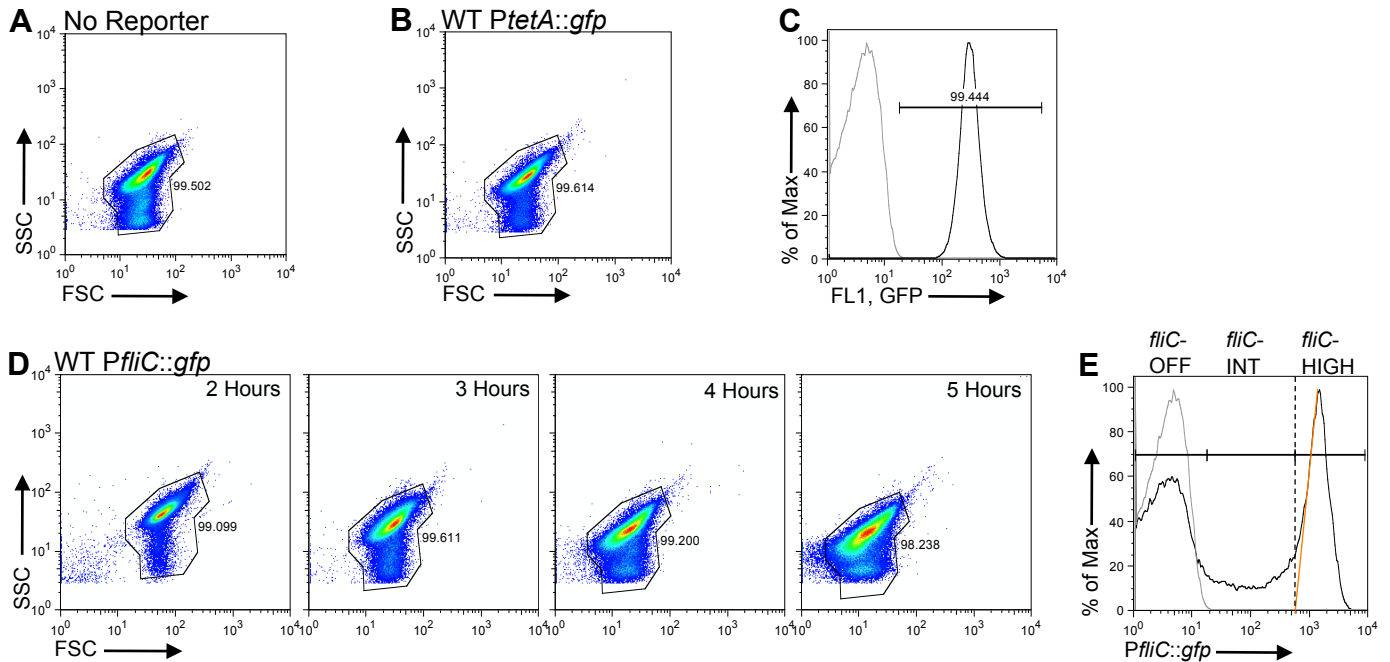

**Figure S1: Gating of flow cytometry data for single cell analyses.** A-D: Forward scatter (FSC, x-axis) by side scatter (SSC, y-axis) plots identify *Salmonella*-specific events. A two-lobed SSC distribution characterizes *Salmonella* and other rod-shaped organisms (Hewitt, C.J. et al. and Rychlik I. et al.). Data were collected on a Becton Dickinson FACScan flow cytometer as indicated in the methods. A) FSCxSSC plot of total events for one sample of the GFP- WT strain (BC1662). 99.502% of events are within the *Salmonella*-specific gate. B) FSCxSSC plot of total events for one sample of the WT strain harboring a pBR322-based p*PtetA::gfp* constitutively expressed reporter (BC1967). 99.614% of events are within the *Salmonella*-specific gate. C) Overlay plot depicting GFP fluorescence of total events shown in (A) (GFP- sample, grey curve) and total events from (B) (constitutive GFP expression, black curve). 99.444% of total events from (B) are GFP+, indicating that they are *Salmonella* as opposed to particulate contaminants. D) FSCxSSC plots for representative WT 14028 p*PfliC::gfp* (BC2117) histograms from figure 2A. The *Salmonella*-specific gate was moved through the timecourse to accommodate the changing size, and therefore FSC, of the organisms. E) The *fliC*-OFF population was always defined as the range of fluorescence observed for the GFP- control (grey curve). For figures 2 and 4, the boundary between *fliC*-INT and *fliC*-HIGH was defined as the x-intercept of a line (orange) approximating the slope of the peak of highest expression for the 5 hour WT (BC2117) sample. For figure 5B, the *fliC*-HIGH gate was defined as the most intense peak of expression observed in those experiments (panel 16).

Hewitt, C.J., & Nebe-Von-Caron G. (2001) An Industrial Application of Multiparameter Flow Cytometry: Assessment of Cell Physiological State and its Application to the Study of Microbial Fermentations. *Cytometry* **44**: 179-187.

Rychlik, I., Cardova, L., Sevcik, M., & Barrow, P.A. (2000) Flow cytometry characterisation of *Salmonella typhimurium* mutants defective in proton translocating proteins and stationary-phase growth phenotype. *J Microbiol Methods* **42**: 255-263.

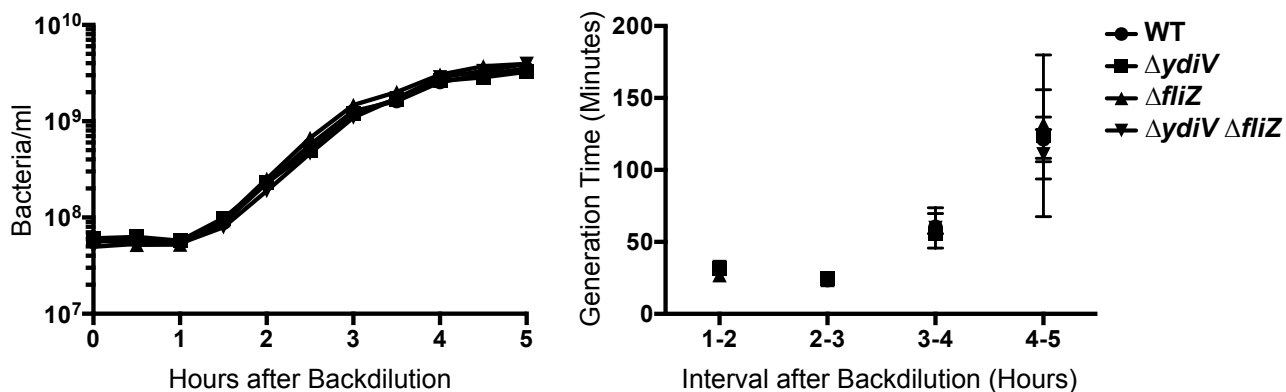

**Figure S2: Growth curves for strains used in figures 2 and 4.** (WT=BC2117,  $\Delta ydiV$ =BC2118,  $\Delta fliZ$ =BC2119 and  $\Delta ydiV \Delta fliZ$ =BC2675). Strains were grown as for flow cytometry experiments, in 2ml LB cultures with 100 $\mu$ g/ml carbenicillin, shaking at 225 rpm. Samples for direct counting on a Beckman Coulter Multisizer 4 were taken every 30 minutes. Left panel: Representative set of growth curves. Strains are in exponential growth phase from 1.5-3 hours after backdilution and post-exponential phase for the remainder of the timecourse. Right panel: Generation times for the four strains between 1-2, 2-3, 3-4 and 4-5 hours after backdilution (not calculated for lag phase (0-1 hour) since no appreciable growth occurred, as seen in left panel). Mean and standard deviation for each strain from three independent experiments is plotted for each hour-long interval. There were no significant differences between the strains in generation time within intervals, as determined by 2-way ANOVA.

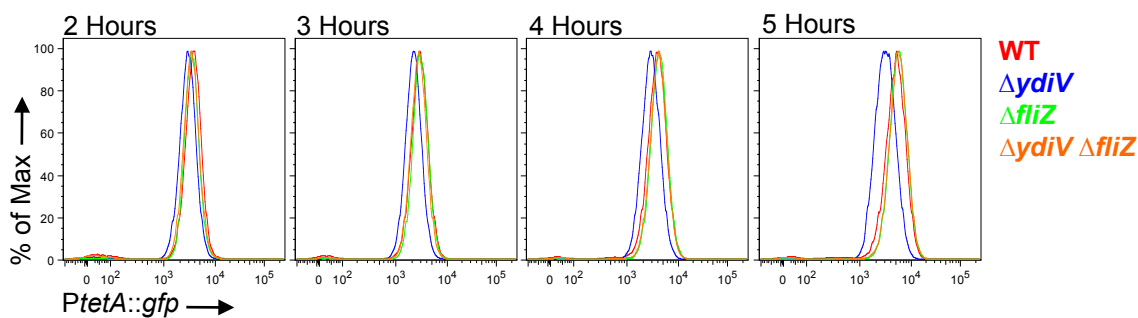

**Figure S3: Monomodal expression of a constitutively expressed, plasmid-borne reporter fusion for WT and the three mutant strains across the timecourse.** (WT: BC1967,  $\Delta ydiV$ : BC1966,  $\Delta fliZ$ : BC3703,  $\Delta ydiV \Delta fliZ$ : BC3704). Data were collected on a Becton Dickinson FACSCantoll flow cytometer using the following parameters: FSC-A 600, SSC-A 550, GFP 450, triggering on FSC-H 400 and SSC-H 200. Events shown fell within the *Salmonella*-specific gate, as shown in figure S1.

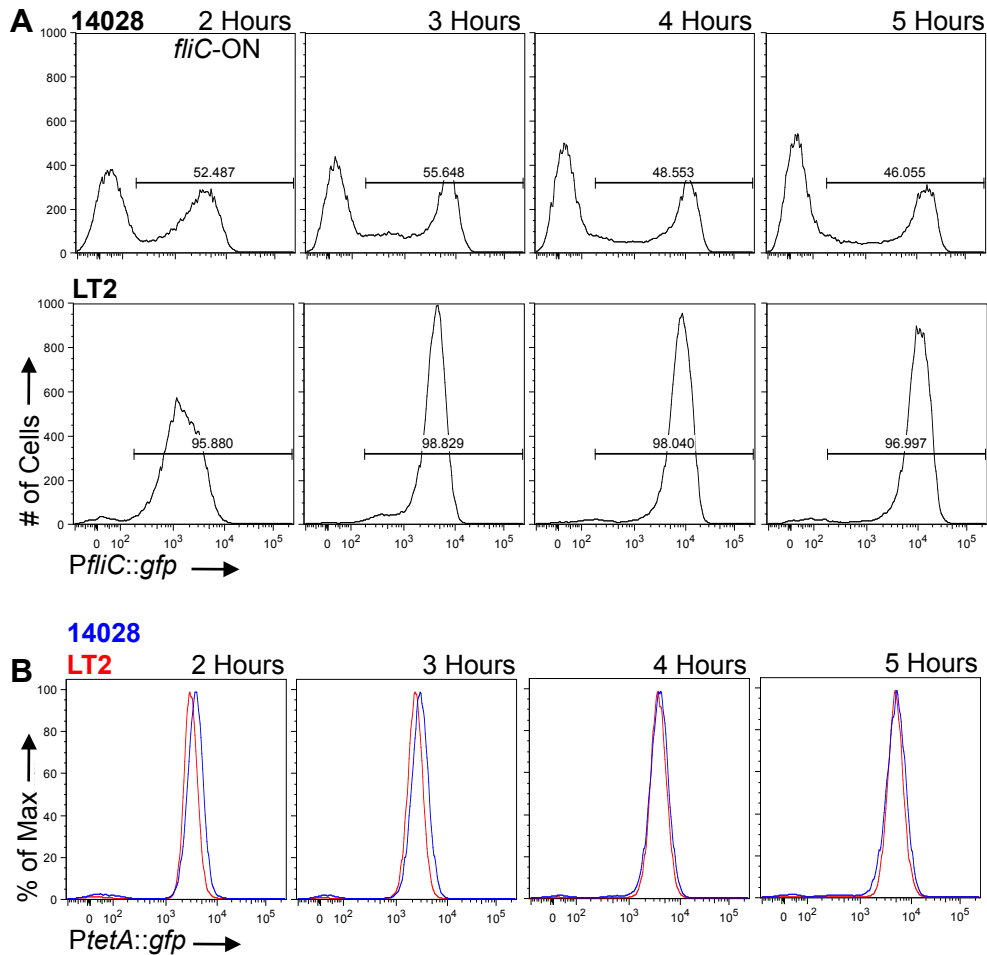

**Figure S4: The census of *fliC* expression differs for *Salmonella* strains 14028 and LT2.** All data were collected on a Becton Dickinson FACSCantoll flow cytometer using the following parameters: FSC-A 600, SSC-A 550, GFP 450, triggering on FSC-H 400 and SSC-H 200. Events shown fell within the *Salmonella*-specific gate, as shown in figure S1. A) *fliC* expression from 2 through 5 hours after backdilution for strains 14028 (BC2117, top panels) and LT2 (BC3616, bottom panels). 14028 maintains a *fliC*-OFF subpopulation throughout the timecourse, while most LT2 cells activate *fliC* expression by 2 hours. *fliC*-ON gate includes all fluorescence exceeding that of the GFP- control. B) The transcriptional pattern of a constitutively expressed promoter (p*PtetA::gfp*) fusion located on pBR322 is monomodal for both 14028 (BC1967) and LT2 (BC3705) throughout the timecourse.

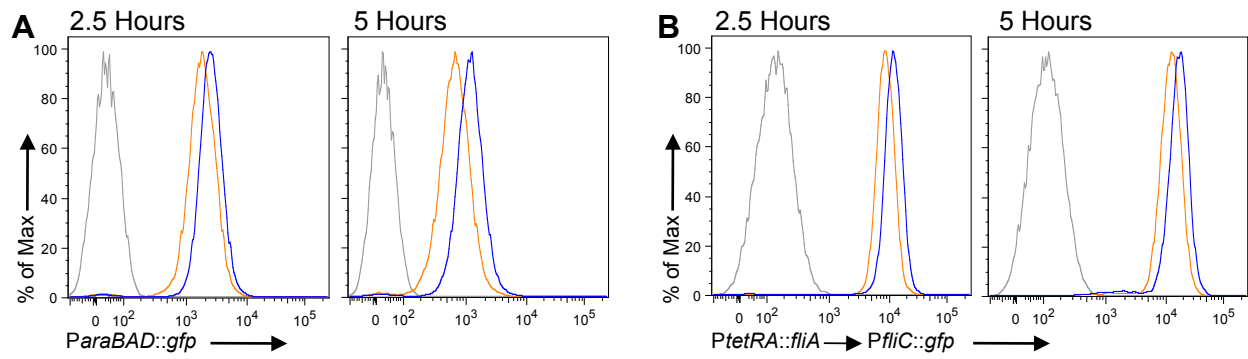

**Figure S5: Unimodal expression from inducible promoters used in this study.** Data were collected on a Becton Dickinson FACSCantoll flow cytometer using the following parameters: FSC-A 600, SSC-A 550, GFP 450, triggering on FSC-H 400 and SSC-H 200. Events shown fell within the *Salmonella*-specific gate, as shown in figure S1. For A and B, the left panel depicts GFP expression 2.5 hours after backdilution, and the right panel depicts GFP expression 5 hours after backdilution. A) Expression of GFP from *ParaBAD* in the pJN105 vector (BC2414). Grey trace: no L-arabinose (L-ara), orange trace: 0.01% L-ara, blue trace: 0.1% L-ara. L-ara was added 2.5 hours before sampling for both timepoints, as for the experiments reported in figure 5B. B) *tetRA*-induced FliA drives unimodal *PfiC::gfp* expression (BC2804) Grey trace: 0 $\mu$ g ml<sup>-1</sup> chlortetracycline (ct), orange trace: 1.6 $\mu$ g ml<sup>-1</sup> ct, blue trace: 3.1 $\mu$ g ml<sup>-1</sup> ct).

**Table S1: Strains and plasmids used in this study, with construction intermediates**

| Strains                     |                                                                                                                                                                                            | Source                |
|-----------------------------|--------------------------------------------------------------------------------------------------------------------------------------------------------------------------------------------|-----------------------|
| BC156                       | <i>Salmonella</i> Typhimurium 14028                                                                                                                                                        | ATCC                  |
| BC1662                      | <i>Salmonella</i> Typhimurium 14028 <i>fijBA</i> ::FRT                                                                                                                                     | Stewart et al., 2011  |
| BC1643                      | <i>Salmonella</i> Typhimurium 14028 <i>fijBA</i> ::FRT <i>ydiV</i> ::FRT                                                                                                                   | Stewart et al., 2011  |
| BC1722                      | <i>Salmonella</i> Typhimurium 14028 <i>fijBA</i> ::FRT <i>fliZ</i> ::FRT                                                                                                                   | This Study            |
| BC2047                      | <i>Salmonella</i> Typhimurium 14028 <i>fijBA</i> ::FRT <i>fliZ</i> ::FRT <i>ydiV</i> ::FRT                                                                                                 | This Study            |
| BC2117                      | <i>Salmonella</i> Typhimurium 14028 <i>fijBA</i> ::FRT <i>pPflIC</i> :: <i>gfp</i> , <i>carbR</i>                                                                                          | This Study            |
| BC2118                      | <i>Salmonella</i> Typhimurium 14028 <i>fijBA</i> ::FRT <i>ydiV</i> ::FRT <i>pPflIC</i> :: <i>gfp</i> , <i>carbR</i>                                                                        | This Study            |
| BC2119                      | <i>Salmonella</i> Typhimurium 14028 <i>fijBA</i> ::FRT <i>fliZ</i> ::FRT <i>pPflIC</i> :: <i>gfp</i> , <i>carbR</i>                                                                        | This Study            |
| BC2675                      | <i>Salmonella</i> Typhimurium 14028 <i>fijBA</i> ::FRT <i>fliZ</i> ::FRT <i>ydiV</i> ::FRT <i>pPflIC</i> :: <i>gfp</i> , <i>carbR</i>                                                      | This Study            |
| BC2307                      | <i>Salmonella</i> Typhimurium 14028 <i>fijBA</i> ::FRT <i>ydiV</i> ::FKF::pKG136, <i>kanR</i>                                                                                              | This Study            |
| BC3276                      | <i>Salmonella</i> Typhimurium 14028 <i>fijBA</i> ::FRT <i>fliZ</i> ::FRT <i>ydiV</i> ::FKF::pKG136 pJN105, <i>kanR</i> <i>gentR</i>                                                        | This Study            |
| BC3277                      | <i>Salmonella</i> Typhimurium 14028 <i>fijBA</i> ::FRT <i>fliZ</i> ::FRT <i>ydiV</i> ::FKF::pKG136 <i>pfliz</i> , <i>kanR</i> <i>gentR</i>                                                 | This Study            |
| BC2264                      | <i>Salmonella</i> Typhimurium 14028 <i>fijBA</i> ::FRT <i>FliC</i> ::3XFLAG, <i>kanR</i>                                                                                                   | Stewart et al., 2011  |
| BC2265                      | <i>Salmonella</i> Typhimurium 14028 <i>fijBA</i> ::FRT <i>ydiV</i> ::FRT <i>FliC</i> ::3XFLAG, <i>kanR</i>                                                                                 | Stewart et al., 2011  |
| BC2266                      | <i>Salmonella</i> Typhimurium 14028 <i>fijBA</i> ::FRT <i>fliZ</i> ::FRT <i>FliC</i> ::3XFLAG, <i>kanR</i>                                                                                 | This Study            |
| BC2638                      | <i>Salmonella</i> Typhimurium 14028 <i>fijBA</i> ::FRT <i>fliZ</i> ::FRT <i>ydiV</i> ::FRT <i>FliC</i> ::3XFLAG, <i>kanR</i>                                                               | This Study            |
| BC2298                      | <i>Salmonella</i> Typhimurium LT2 <i>ydiV</i> ::FKF::pKG136, <i>kanR</i> (TH13742)                                                                                                         | Wozniak et al., 2009  |
| BC1697                      | <i>Salmonella</i> Typhimurium LT2 <i>ydiV</i> 240::Tn10dTc(del-25) ( <i>ydiV</i> T-POP, TH8757), <i>tetR</i>                                                                               | Wozniak et al., 2009  |
| BC3314                      | <i>Salmonella</i> Typhimurium 14028 <i>fijBA</i> ::FRT <i>fliZ</i> ::FRT <i>ydiV</i> 240::Tn10dTc(del-25) <i>pfliz</i> <i>pPflIC</i> :: <i>gfp</i> , <i>tetR</i> <i>gentR</i> <i>carbR</i> | This Study            |
| BC2414                      | <i>Salmonella</i> Typhimurium 14028 <i>fijBA</i> ::FRT <i>pgfp</i> , <i>gentR</i>                                                                                                          | This Study            |
| BC1091                      | <i>Salmonella</i> Typhimurium 14028 pKAS32::PflIC:: <i>gfp</i> , <i>carbR</i>                                                                                                              | Cummings et al., 2006 |
| BC2804                      | <i>Salmonella</i> Typhimurium 14028 <i>fijBA</i> ::FRT <i>flgM</i> ::FRT pKAS32::PflIC:: <i>gfp</i> <i>tetRA</i> :: <i>fliA</i> tet-driven <i>fliA</i> , <i>carbR</i> <i>tetR</i>          | This Study            |
| BC1967                      | <i>Salmonella</i> Typhimurium 14028 <i>fijBA</i> ::FRT <i>pTetA</i> :: <i>gfp</i> <i>carbR</i>                                                                                             | This Study            |
| BC1966                      | <i>Salmonella</i> Typhimurium 14028 <i>fijBA</i> ::FRT <i>ydiV</i> ::FRT <i>pTetA</i> :: <i>gfp</i> <i>carbR</i>                                                                           | This Study            |
| BC3703                      | <i>Salmonella</i> Typhimurium 14028 <i>fijBA</i> ::FRT <i>fliZ</i> ::FRT <i>pTetA</i> :: <i>gfp</i> <i>carbR</i>                                                                           | This Study            |
| BC3704                      | <i>Salmonella</i> Typhimurium 14028 <i>fijBA</i> ::FRT <i>fliZ</i> ::FRT <i>ydiV</i> ::FRT <i>pTetA</i> :: <i>gfp</i> <i>carbR</i>                                                         | This Study            |
| BC3616                      | <i>Salmonella</i> Typhimurium LT2 <i>fijBA</i> ::FRT <i>pPflIC</i> :: <i>gfp</i> , <i>carbR</i>                                                                                            | This Study            |
| BC3705                      | <i>Salmonella</i> Typhimurium LT2 <i>fijBA</i> ::FRT <i>pTetA</i> :: <i>gfp</i> <i>carbR</i>                                                                                               | This Study            |
| <b>Plasmids</b>             |                                                                                                                                                                                            |                       |
| <i>pPflIC</i> :: <i>gfp</i> | pSRB1, PflIC:: <i>gfp</i> construct in pBR322 vector, <i>carbR</i>                                                                                                                         | Cummings et al., 2006 |
| pJN105                      | Vector, <i>gentR</i>                                                                                                                                                                       | Newman et al., 1999   |
| <i>pfliz</i>                | <i>Salmonella</i> Typhimurium 14028 <i>fliZ</i> and native RBS cloned into pJN105, arabinose-induced expression, <i>gentR</i>                                                              | This Study            |
| <i>pgfp</i>                 | <i>gfp</i> and RBS from pDW5 (Cummings et al., 2006) cloned into pJN105, arabinose-induced expression, <i>gentR</i>                                                                        | This Study            |
| <i>pTetA</i> :: <i>gfp</i>  | pDW5, <i>carbR</i>                                                                                                                                                                         | Cummings et al., 2006 |

| <b>Figure 2: Subpopulation Percentages</b>      |                           |                          |                          |
|-------------------------------------------------|---------------------------|--------------------------|--------------------------|
| <b>Experiment 1</b>                             |                           |                          |                          |
| Sample                                          | Percent in fliC-HIGH Gate | Percent in fliC-INT Gate | Percent in fliC-OFF Gate |
| BC2117 2 Hr                                     | 4.91                      | 51.2                     | 43.9                     |
| BC2117 3 Hr                                     | 22.9                      | 35.1                     | 42.1                     |
| BC2117 4 Hr                                     | 31.1                      | 18.8                     | 50.1                     |
| BC2117 5 Hr                                     | 31.7                      | 14.3                     | 54                       |
| BC2119 2 Hr                                     | 5.25                      | 45.7                     | 49                       |
| BC2119 3 Hr                                     | 20.4                      | 31.6                     | 48                       |
| BC2119 4 Hr                                     | 21.1                      | 28.4                     | 50.5                     |
| BC2119 5 Hr                                     | 16.8                      | 26.8                     | 56.3                     |
| <b>Experiment 2</b>                             |                           |                          |                          |
| Sample                                          | Percent in fliC-HIGH Gate | Percent in fliC-INT Gate | Percent in fliC-OFF Gate |
| BC2117 2 Hr                                     | 7.65                      | 50.4                     | 41.9                     |
| BC2117 3 Hr                                     | 25.6                      | 33.5                     | 40.8                     |
| BC2117 4 Hr                                     | 37                        | 20.3                     | 42.7                     |
| BC2117 5 Hr                                     | 38.8                      | 16.2                     | 45                       |
| BC2119 2 Hr                                     | 6.26                      | 44.4                     | 49.3                     |
| BC2119 3 Hr                                     | 26.6                      | 28.4                     | 45.1                     |
| BC2119 4 Hr                                     | 27.6                      | 26.3                     | 46.1                     |
| BC2119 5 Hr                                     | 21.5                      | 27.8                     | 50.8                     |
| <b>Experiment 3 (Representative Histograms)</b> |                           |                          |                          |
| Sample                                          | Percent in fliC-HIGH Gate | Percent in fliC-INT Gate | Percent in fliC-OFF Gate |
| BC2117 2 Hr                                     | 7.23                      | 42.7                     | 50.1                     |
| BC2117 3 Hr                                     | 24.2                      | 30.1                     | 45.7                     |
| BC2117 4 Hr                                     | 35.3                      | 17.4                     | 47.2                     |
| BC2117 5 Hr                                     | 34.1                      | 15                       | 51                       |
| BC2119 2 Hr                                     | 6.29                      | 45.3                     | 48.5                     |
| BC2119 3 Hr                                     | 26.3                      | 30.3                     | 43.4                     |
| BC2119 4 Hr                                     | 26.2                      | 26.6                     | 47.2                     |
| BC2119 5 Hr                                     | 23                        | 29.8                     | 47.2                     |
| <b>Averages</b>                                 |                           |                          |                          |
| Sample                                          | Percent in fliC-HIGH Gate | Percent in fliC-INT Gate | Percent in fliC-OFF Gate |
| BC2117 2 Hr                                     | 6.6                       | 48.1                     | 45.3                     |
| BC2117 3 Hr                                     | 24.2                      | 32.9                     | 42.9                     |
| BC2117 4 Hr                                     | 34.5                      | 18.8                     | 46.7                     |
| BC2117 5 Hr                                     | 34.9                      | 15.2                     | 50.0                     |
| BC2119 2 Hr                                     | 5.9                       | 45.1                     | 48.9                     |
| BC2119 3 Hr                                     | 24.4                      | 30.1                     | 45.5                     |
| BC2119 4 Hr                                     | 25.0                      | 27.1                     | 47.9                     |
| BC2119 5 Hr                                     | 20.4                      | 28.1                     | 51.4                     |
|                                                 |                           |                          |                          |
|                                                 |                           |                          |                          |
|                                                 |                           |                          |                          |
|                                                 |                           |                          |                          |

| <b>Figure 2: Mean Fluorescent Intensities</b>   |                      |                     |                     |
|-------------------------------------------------|----------------------|---------------------|---------------------|
| <b>Experiment 1</b>                             |                      |                     |                     |
| Sample                                          | fliC-HIGH,Mean,FL1-H | fliC-INT,Mean,FL1-H | fliC-OFF,Mean,FL1-H |
| BC2117 2 Hr                                     | 807                  | 209                 | 6.64                |
| BC2117 3 Hr                                     | 908                  | 257                 | 5.05                |
| BC2117 4 Hr                                     | 1351                 | 208                 | 4.78                |
| BC2117 5 Hr                                     | 1641                 | 191                 | 4.66                |
| BC2119 2 Hr                                     | 826                  | 196                 | 6.54                |
| BC2119 3 Hr                                     | 926                  | 273                 | 4.77                |
| BC2119 4 Hr                                     | 1253                 | 245                 | 4.44                |
| BC2119 5 Hr                                     | 1438                 | 223                 | 4.4                 |
| <b>Experiment 2</b>                             |                      |                     |                     |
| Sample                                          | fliC-HIGH,Mean,FL1-H | fliC-INT,Mean,FL1-H | fliC-OFF,Mean,FL1-H |
| BC2117 2 Hr                                     | 877                  | 226                 | 5.87                |
| BC2117 3 Hr                                     | 936                  | 250                 | 5.14                |
| BC2117 4 Hr                                     | 1367                 | 207                 | 4.81                |
| BC2117 5 Hr                                     | 1528                 | 215                 | 4.38                |
| BC2119 2 Hr                                     | 877                  | 197                 | 6.46                |
| BC2119 3 Hr                                     | 996                  | 272                 | 4.93                |
| BC2119 4 Hr                                     | 1300                 | 253                 | 4.55                |
| BC2119 5 Hr                                     | 1422                 | 242                 | 4.35                |
| <b>Experiment 3 (Representative Histograms)</b> |                      |                     |                     |
| Sample                                          | fliC-HIGH,Mean,FL1-H | fliC-INT,Mean,FL1-H | fliC-OFF,Mean,FL1-H |
| BC2117 2 Hr                                     | 826                  | 232                 | 6.3                 |
| BC2117 3 Hr                                     | 971                  | 239                 | 4.86                |
| BC2117 4 Hr                                     | 1421                 | 196                 | 4.52                |
| BC2117 5 Hr                                     | 1596                 | 193                 | 4.16                |
| BC2119 2 Hr                                     | 832                  | 200                 | 6.4                 |
| BC2119 3 Hr                                     | 973                  | 270                 | 4.49                |
| BC2119 4 Hr                                     | 1253                 | 255                 | 4.13                |
| BC2119 5 Hr                                     | 1386                 | 241                 | 3.88                |
| <b>Averages</b>                                 |                      |                     |                     |
| Sample                                          | fliC-HIGH,Mean,FL1-H | fliC-INT,Mean,FL1-H | fliC-OFF,Mean,FL1-H |
| BC2117 2 Hr                                     | 836.7                | 222.3               | 6.3                 |
| BC2117 3 Hr                                     | 938.3                | 248.7               | 5.0                 |
| BC2117 4 Hr                                     | 1379.7               | 203.7               | 4.7                 |
| BC2117 5 Hr                                     | 1588.3               | 199.7               | 4.4                 |
| BC2119 2 Hr                                     | 845.0                | 197.7               | 6.5                 |
| BC2119 3 Hr                                     | 965.0                | 271.7               | 4.7                 |
| BC2119 4 Hr                                     | 1268.7               | 251.0               | 4.4                 |
| BC2119 5 Hr                                     | 1415.3               | 235.3               | 4.2                 |









| <b>Figure 4: Mean Fluorescent Intensities</b> |                      |                     |                     |
|-----------------------------------------------|----------------------|---------------------|---------------------|
| <b>Experiment 3</b>                           |                      |                     |                     |
| Sample                                        | fliC-HIGH,Mean,FL1-H | fliC-INT,Mean,FL1-H | fliC-OFF,Mean,FL1-H |
| BC2117 2 Hr                                   | 813                  | 238                 | 6.27                |
| BC2117 3 Hr                                   | 967                  | 255                 | 4.89                |
| BC2117 4 Hr                                   | 1381                 | 204                 | 4.48                |
| BC2117 5 Hr                                   | 1575                 | 200                 | 4.12                |
| BC2118 2 Hr                                   | 1129                 | 244                 | 7.77                |
| BC2118 3 Hr                                   | 1236                 | 207                 | 7.42                |
| BC2118 4 Hr                                   | 1671                 | 170                 | 7.28                |
| BC2118 5 Hr                                   | 1783                 | 145                 | 6.73                |
| BC2119 2 Hr                                   | 826                  | 209                 | 6.26                |
| BC2119 3 Hr                                   | 1051                 | 276                 | 4.49                |
| BC2119 4 Hr                                   | 1255                 | 260                 | 4.08                |
| BC2119 5 Hr                                   | 1384                 | 244                 | 3.83                |
| BC2675 2 Hr                                   | 1262                 | 245                 | 7.87                |
| BC2675 3 Hr                                   | 1466                 | 203                 | 7.48                |
| BC2675 4 Hr                                   | 2013                 | 159                 | 7.53                |
| BC2675 5 Hr                                   | 2401                 | 136                 | 7.31                |
|                                               |                      |                     |                     |
| <b>Averages</b>                               |                      |                     |                     |
| Sample                                        | fliC-HIGH,Mean,FL1-H | fliC-INT,Mean,FL1-H | fliC-OFF,Mean,FL1-H |
| BC2117 2 Hr                                   | 811.3                | 234.7               | 6.0                 |
| BC2117 3 Hr                                   | 953.3                | 272.3               | 4.8                 |
| BC2117 4 Hr                                   | 1319.3               | 212.7               | 4.4                 |
| BC2117 5 Hr                                   | 1507.7               | 207.0               | 4.1                 |
| BC2118 2 Hr                                   | 1157.7               | 246.7               | 7.4                 |
| BC2118 3 Hr                                   | 1239.0               | 202.0               | 7.4                 |
| BC2118 4 Hr                                   | 1658.0               | 166.3               | 7.2                 |
| BC2118 5 Hr                                   | 1846.7               | 144.7               | 6.7                 |
| BC2119 2 Hr                                   | 839.3                | 212.0               | 6.2                 |
| BC2119 3 Hr                                   | 1057.3               | 274.3               | 4.6                 |
| BC2119 4 Hr                                   | 1284.7               | 252.3               | 4.1                 |
| BC2119 5 Hr                                   | 1412.7               | 244.7               | 3.9                 |
| BC2675 2 Hr                                   | 1296.0               | 239.7               | 7.2                 |
| BC2675 3 Hr                                   | 1464.0               | 197.7               | 6.8                 |
| BC2675 4 Hr                                   | 2095.0               | 152.0               | 7.0                 |
| BC2675 5 Hr                                   | 2395.3               | 131.7               | 6.7                 |
